# Supplementary material for: Highly radiation-resistant Al-MOF selected based on the radiation stability rules of metal–organic frameworks with ultra-high thorium ion adsorption capacity
Source: Royal Society of Chemistry journal article supplement (doi:10.1039/d4en00076e), 2024-01-01
Supplement: d4en00076e1.pdf [file d4en00076e1.pdf]

## Supplementary information

### **Highly radiation-resistant Al-MOF selected based on the radiation stability rules of metal-organic frameworks with ultra-high thorium ion adsorption capacity**

*Xiaofan Ding, Zhanjun Zhang, Yinyan Li, Ke Ma, Tiantian Jin, Zhaoning Feng, Tian Lan\*, Jing  
Zhao\*, Songtao Xiao\**

*Department of Radiochemistry, China Institute of Atomic Energy, Beijing 102413, China*

\*E-mail: lant3@163.com (T. Lan), zhaojing.mail@qq.com (J. Zhao), xiao\_songtao@126.com (S.  
Xiao)

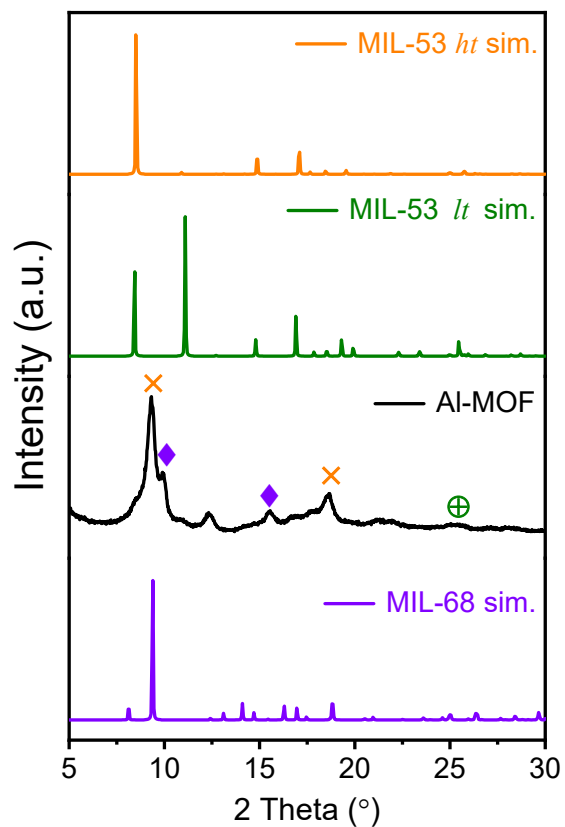

**Fig. S1** PXRd pattern of the Al-MOF. Peak labeled with ◆, ×, ⊕ represent MIL-68, MIL-53 *lt* sim., MIL-53 *ht* sim., respectively.

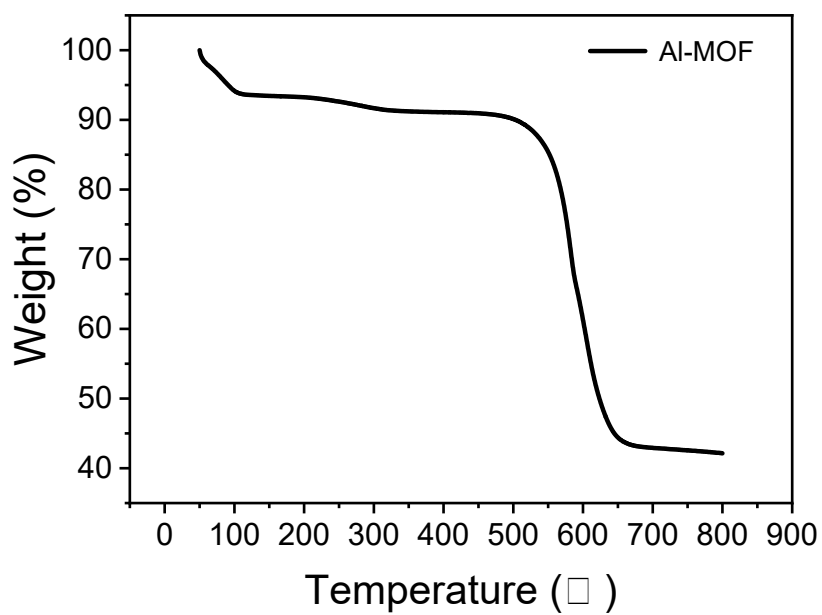

**Fig. S2** TGA curve of Al-MOF

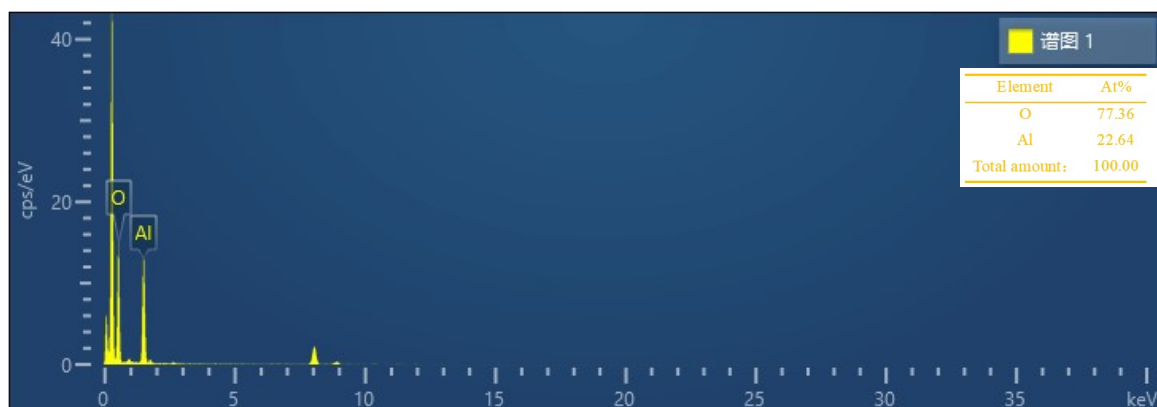

**Fig. S3** EDS spectrum of Al-MOF

**Table S1** Kinetic fitting parameters of Th (IV) adsorption in Al-MOF

| Kinetic model       | T  | $C_0$  | $k_1/k_2$                        | $R^2$ |
|---------------------|----|--------|----------------------------------|-------|
|                     | °C | (mg/L) | ( $\text{min}^{-1}$ )/(g/mg·min) |       |
| Pseudo-first order  | 25 | 400    | 0.035771                         | 0.973 |
| Pseudo-second order | 25 | 400    | 0.000067                         | 0.982 |

**Table S2** Langmuir and Freundlich model fitting parameters for Th (IV) adsorption

| Model      | Parameters                                       | T(K)    |          |         |
|------------|--------------------------------------------------|---------|----------|---------|
|            |                                                  | 298K    | 308K     | 318K    |
| Langmuir   | $Q_{\max}$ (mg/g)                                | 1324.64 | 16703.31 | 1844.98 |
|            | $K_L$ (L/mg)                                     | 0.1668  | 0.1547   | 0.2664  |
|            | $R^2$                                            | 0.901   | 0.899    | 0.971   |
| Freundlich | $K_F(\text{mg}^{1-n} \cdot \text{L}^n/\text{g})$ | 200.53  | 251.14   | 410.35  |
|            | n                                                | 0.7651  | 0.7252   | 0.7979  |
|            | $R^2$                                            | 0.888   | 0.874    | 0.967   |

**Table S3** Thermodynamic parameters of Th (IV) adsorption in Al-MOF

| T (K) | $\Delta G^0$ (kJ·mol <sup>-1</sup> ) | $\Delta H^0$ (kJ·mol <sup>-1</sup> ) | $\Delta S^0$ (J·mol <sup>-1</sup> ) |
|-------|--------------------------------------|--------------------------------------|-------------------------------------|
| 298   | -2.905                               |                                      |                                     |
| 308   | -4.305                               | 31.686                               | 116.313                             |
| 318   | -5.222                               |                                      |                                     |

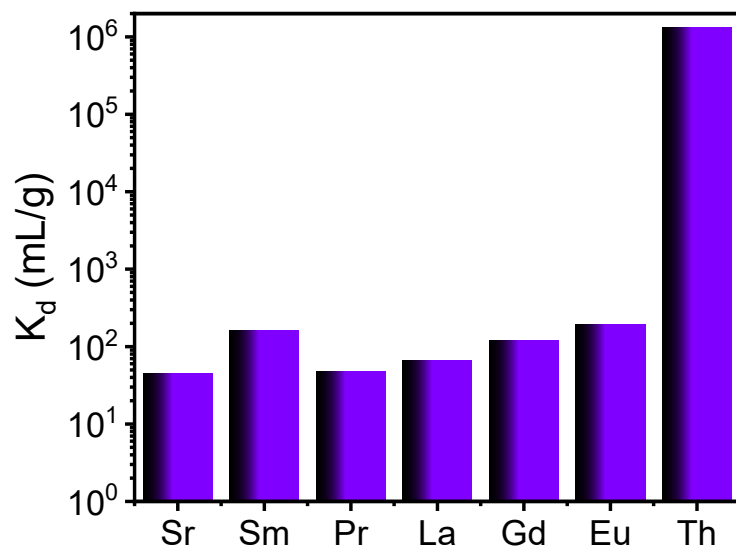

Fig. S4 The distribution coefficients for various metal ions

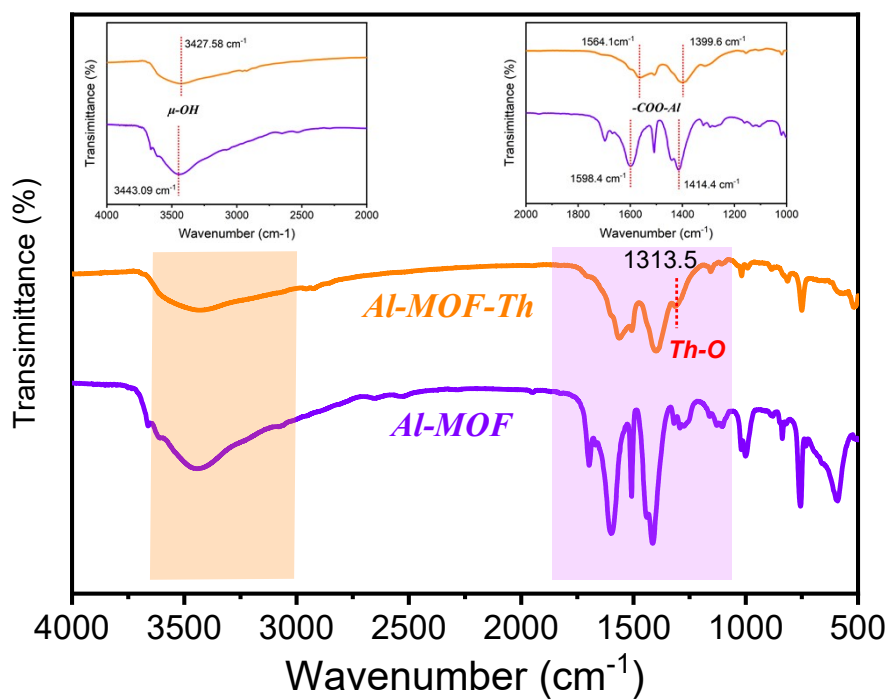

Fig. S5 FT-IR spectra of Al-MOF and Th (IV)-loaded sample

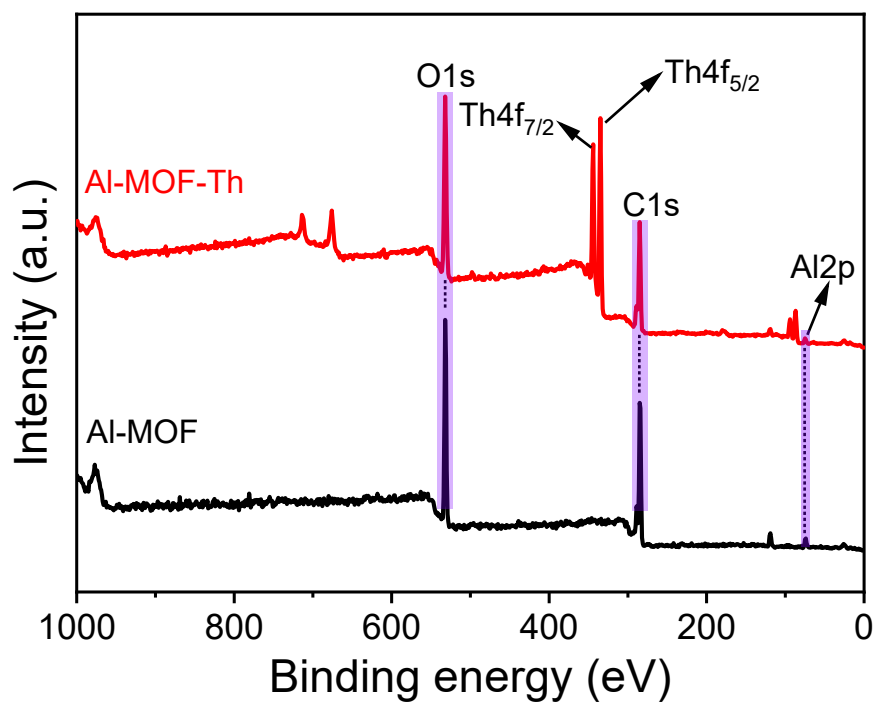

Fig. S6 XPS spectra of Al-MOF and Th (IV)-loaded sample

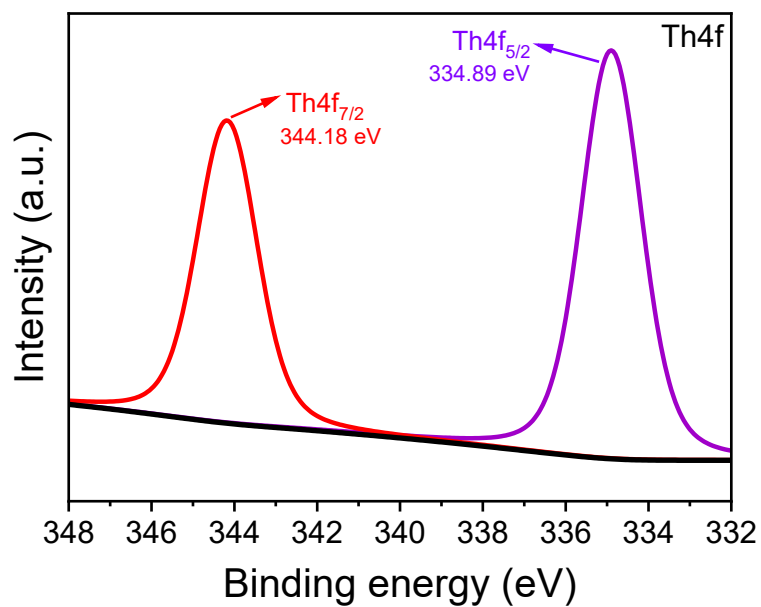

Fig. S7 Th4f XPS spectra of Th (IV)-loaded Al-MOF

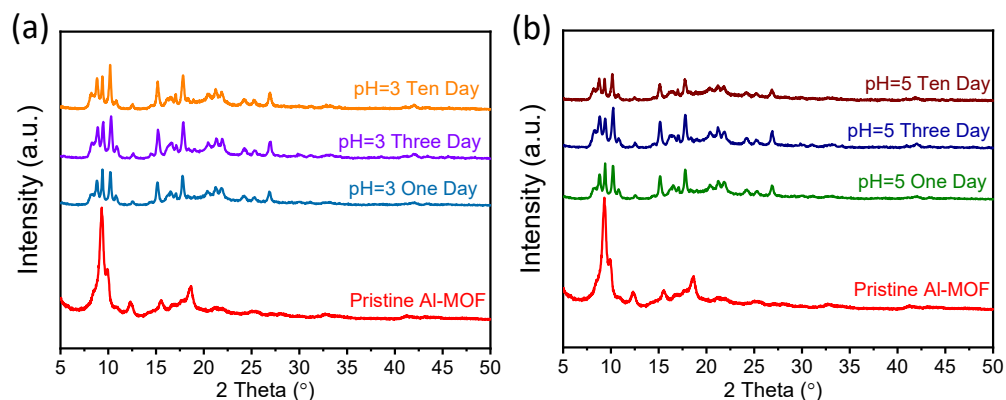

**Fig. S8** Stability of Al-MOF in aqueous solutions with different pH ((a) pH=3, (b) pH=5).

**Table S4** The adsorption capacity of the MOFs adsorbents for Th (IV) and the corresponding adsorption conditions

| MOFs adsorbents                                 | Adsorption capacity (mg/g) | Conditions            | Ref.      |
|-------------------------------------------------|----------------------------|-----------------------|-----------|
| MOF-LIC-SA                                      | 18.68                      | T=298 K, pH=5         | 1         |
| MIL-100(Al)                                     | 167                        | T=293–295 K, pH=3-3.5 | 2         |
| Fe <sub>3</sub> O <sub>4</sub> @AMCA-MIL-53(Al) | 285.7                      | T=298 K, pH=4.7       | 3         |
| UiO-66-(COOH) <sub>2</sub>                      | 350                        | T=298 K, pH=3         | 4         |
| Ho-MOF                                          | 350                        | T=303 K, pH=5         | 5         |
| MOF-303                                         | 461.7                      | T=298 K, pH=3         | 6         |
| IEF-11                                          | 305.9                      | T=298 K, pH=3         | 7         |
| CAU-1-NH <sub>2</sub>                           | 404                        | T=298 K, pH=5         | 8         |
| Al-MOF                                          | 1324.64                    | T=298 K, pH=5         | This work |

## References

- 1 V.V. Sravani, S. Sengupta, B. Sreenivasulu, G. Gopakumar, S. Tripathi, M. Chandra, C.V.S.B. Rao, A. Suresh, S. Nagarajan, Highly efficient functionalized MOF-LIC-1 for extraction of U(VI) and Th(IV) from aqueous solution: experimental and theoretical studies, *Dalton Trans.*, 2022,51, 3557-3571, DOI: 10.1039/D1DT03317D.
- 2 C. Falaise, C. Volkringer, R. Giovine, B. Prelot, M. Huve, Capture of actinides (Th<sup>4+</sup>, UO<sub>2</sub><sup>2+</sup>) and surrogating lanthanide (Nd<sup>3+</sup>) in porous metal–organic framework MIL-100(Al) from water: selectivity and imaging of embedded nanoparticles. *Dalton Trans.* 2017; 46:12010-12014, DOI: 10.1039/C7DT02155K.
- 3 A. A. Alqadami, M. Naushad, Z. A. Alothman, A. A. Ghfar, Novel Metal–Organic Framework (MOF) Based Composite Material for the Sequestration of U (VI) and Th (IV) Metal Ions from Aqueous Environment. *ACS Appl. Mater. Interfaces* 2017; 9:36026-36037. DOI: 10.1021/acsami.7b10768
- 4 N. Zhang, L-Y. Yuan, W-L. Guo, S-Z. Luo, Z-F. Chai, W-Q. Shi, Extending the Use of Highly Porous and Functionalized MOFs to Th(IV) Capture. *ACS Appl. Mater. Interfaces* 2017; 9:25216-25224, DOI: 10.1021/acsami.7b04192.
- 5 Y. Xiong, Y. Gao, X. Guo, Y. Wang, X. Su, X. Sun, Water-Stable metal-organic framework material with uncoordinated terpyridine site for selective Th(IV)/Ln(III) separation, *ACS Sustainable Chem. Eng.* 7 (3) (2019) 3120–3126, DOI: 10.1021/acssuschemeng.8b04875.
- 6 X. Chen, X. Liu, S. Xiao, W. Xue, X. Zhao, Q. Yang, A β-ray irradiation resistant MOF-based trap for efficient capture of Th (IV) ion. *Sep. Purif. Technol.* 2022; 297:121517, DOI: 10.1016/j.seppur.2022.121517.
- 7 X. Chen, G. Li, S. Xiao, W. Xue, X. Zhao, Q. Yang, Efficient Capture of Th (IV) and U (VI) by Radiation-Resistant Oxygen-Rich Ion Traps Based on a Metal–Organic Framework. *ACS Appl. Mater. Interfaces* 2023, 15, 20, 25029–25040, DOI: 10.1021/acsami.3c02582.
- 8 N. Gumber, R.V. Pai, J. Bahadur, S. Sengupta, D. Das, U. K. Goutam, γ-Resistant Microporous CAU-1 MOF for Selective Remediation of Thorium. *ACS Omega* 2023; 8:12268-12282, DOI: 10.1021/acsomega.2c08274.
